# Supplementary material
Source: PubMed Central journal article supplement (PMC1756908)
Supplement: pgen.0020215.st001.pdf [file pgen.0020215.st001.pdf]

**Table S1.** Amount by which allele sizes were translated to make the HGDP-CEPH and Indian microsatellite data comparable.

|    | <b>Name of locus in data file for India</b> | <b>Name of locus in data file for HGDP-CEPH</b> | <b>Amount to subtract from allele sizes in India data for combined analysis with HGDP-CEPH data</b> |
|----|---------------------------------------------|-------------------------------------------------|-----------------------------------------------------------------------------------------------------|
| 1  | ATA11D10M_06_Q                              | ATA11D10                                        | 1                                                                                                   |
| 2  | ATA18A07M_09                                | ATA18A07                                        | 1                                                                                                   |
| 3  | ATA20G07M_05_P                              | ATA20G07                                        | 1                                                                                                   |
| 4  | ATA22G07P_06_Q                              | ATA22G07                                        | 7                                                                                                   |
| 5  | ATA23A10M_05_Q                              | ATA23A10                                        | 1                                                                                                   |
| 6  | ATA25E07M_01_P                              | ATA25E07                                        | 1                                                                                                   |
| 7  | ATA25F09M_12                                | ATA25F09                                        | 1                                                                                                   |
| 8  | ATA27A06P_12                                | ATA27A06                                        | 7                                                                                                   |
| 9  | ATA27C07P_04                                | ATA27C07                                        | 7                                                                                                   |
| 10 | ATA27D04P_02_P                              | ATA27D04                                        | 7                                                                                                   |
| 11 | ATA28G05P_15                                | ATA28G05                                        | 7                                                                                                   |
| 12 | ATA29A06P_12                                | ATA29A06                                        | 7                                                                                                   |
| 13 | ATA29C07L_01_Q                              | ATA29C07                                        | ?                                                                                                   |
| 14 | ATA29G03Z_14                                | ATA29G03                                        | 0                                                                                                   |
| 15 | ATA31G11P_10                                | ATA31G11                                        | 7                                                                                                   |
| 16 | ATA33B03Z_11                                | ATA33B03                                        | 0                                                                                                   |
| 17 | ATA34E08N_11                                | ATA34E08                                        | 0                                                                                                   |
| 18 | ATA42G12M_01_P                              | ATA42G12                                        | 1                                                                                                   |
| 19 | ATA55A11N_16                                | ATA55A11                                        | 0                                                                                                   |
| 20 | ATA58A02P_17                                | ATA58A02                                        | 7                                                                                                   |
| 21 | ATA59H06Z_09                                | ATA59H06                                        | 0                                                                                                   |
| 22 | ATA5A04N_10                                 | ATA5A04                                         | 0                                                                                                   |
| 23 | ATA5A09N_13                                 | ATA5A09                                         | 0                                                                                                   |
| 24 | ATA78D02N_17                                | ATA78D02                                        | 0                                                                                                   |
| 25 | ATA82B02N_18                                | ATA82B02                                        | 0                                                                                                   |
| 26 | ATA9B04N_11                                 | ATA9B04                                         | 0                                                                                                   |
| 27 | ATC6A06M_17                                 | ATC6A06                                         | 1                                                                                                   |
| 28 | GAAT1A4N_08                                 | GAAT1A4                                         | 0                                                                                                   |
| 29 | GAAT2C03P_17                                | GAAT2C03                                        | 7                                                                                                   |
| 30 | GATA115E01N_10                              | GATA115E01                                      | 0                                                                                                   |
| 31 | GATA116B01N_02_P                            | GATA116B01                                      | 0                                                                                                   |
| 32 | GATA117D01N_11                              | GATA117D01                                      | 0                                                                                                   |
| 33 | GATA11A11P_05_Q                             | GATA11A11                                       | 7                                                                                                   |
| 34 | GATA11C06N_16                               | GATA11C06                                       | 0                                                                                                   |
| 35 | GATA11C08P_13                               | GATA11C08                                       | 7                                                                                                   |
| 36 | GATA11E02N_06_P                             | GATA11E02                                       | 0                                                                                                   |
| 37 | GATA121A08N_10                              | GATA121A08                                      | 0                                                                                                   |
| 38 | GATA124C08N_01_P                            | GATA124C08                                      | 0                                                                                                   |
| 39 | GATA128C02M_03_P                            | GATA128C02                                      | 1                                                                                                   |
| 40 | GATA129B03N_20                              | GATA129B03                                      | 0                                                                                                   |
| 41 | GATA129D11N_21                              | GATA129D11                                      | 0                                                                                                   |
| 42 | GATA12A07N_01_P                             | GATA12A07                                       | 0                                                                                                   |
| 43 | GATA133A08Q_01_P                            | GATA133A08                                      | 4                                                                                                   |
| 44 | GATA137H02N_07_P                            | GATA137H02                                      | 0                                                                                                   |
| 45 | GATA145D10N_05_P                            | GATA145D10                                      | 0                                                                                                   |
| 46 | GATA151F03N_15                              | GATA151F03                                      | 0                                                                                                   |

|    |                  |            |     |
|----|------------------|------------|-----|
| 47 | GATA163B10N_06_P | GATA163B10 | 0   |
| 48 | GATA164B08P_03_P | GATA164B08 | 7   |
| 49 | GATA165G02M_06_Q | GATA165G02 | 1   |
| 50 | GATA177C03N_18   | GATA177C03 | 0   |
| 51 | GATA178F11Z_18   | GATA178F11 | -67 |
| 52 | GATA178G09M_02_Q | GATA178G09 | 1   |
| 53 | GATA185C06Z_18   | GATA185C06 | 17  |
| 54 | GATA185H04N_17   | GATA185H04 | 0   |
| 55 | GATA187D09N_09   | GATA187D09 | 0   |
| 56 | GATA189C06M_07_Q | GATA189C06 | 1   |
| 57 | GATA197B10P_15   | GATA197B10 | 7   |
| 58 | GATA198B05N_22   | GATA198B05 | 0   |
| 59 | GATA22F09P_16    | GATA22F09  | 7   |
| 60 | GATA22F11NZ_03_Q | GATA22F11  | -58 |
| 61 | GATA22G05M_04    | GATA22G05  | 1   |
| 62 | GATA23B01N_19    | GATA23B01  | 0   |
| 63 | GATA23C03P_13    | GATA23C03  | 7   |
| 64 | GATA23D03N_02_Q  | GATA23D03  | 0   |
| 65 | GATA23E06L_11    | GATA23E06  | 3   |
| 66 | GATA23F06L_11    | GATA23F06  | 3   |
| 67 | GATA24D12P_07_P  | GATA24D12  | 7   |
| 68 | GATA24H01N_04    | GATA24H01  | 0   |
| 69 | GATA26D02M_12    | GATA26D02  | 1   |
| 70 | GATA26E03M_08    | GATA26E03  | 1   |
| 71 | GATA26G09P_01_P  | GATA26G09  | 7   |
| 72 | GATA27C08P_03_P  | GATA27C08  | 7   |
| 73 | GATA28D01M_11    | GATA28D01  | 1   |
| 74 | GATA29A05P_01_P  | GATA29A05  | 7   |
| 75 | GATA29B01L_19    | GATA29B01  | -1  |
| 76 | GATA29F06Z_20    | GATA29F06  | 1   |
| 77 | GATA30A03N_14    | GATA30A03  | 0   |
| 78 | GATA30D09N_07_Q  | GATA30D09  | 0   |
| 79 | GATA30E06P_02_Q  | GATA30E06  | 7   |
| 80 | GATA3C02M_03_Q   | GATA3C02   | 1   |
| 81 | GATA3H06M_05_Q   | GATA3H06   | 1   |
| 82 | GATA41G07M_07_P  | GATA41G07  | 1   |
| 83 | GATA42H02P_04    | GATA42H02  | 8   |
| 84 | GATA43H01M_14    | GATA43H01  | 1   |
| 85 | GATA43H03N_13    | GATA43H03  | 0   |
| 86 | GATA44F10P_19    | GATA44F10  | 7   |
| 87 | GATA45B10N_20    | GATA45B10  | 0   |
| 88 | GATA49C09N_17    | GATA49C09  | 0   |
| 89 | GATA49D12N_12    | GATA49D12  | 0   |
| 90 | GATA50C03N_15    | GATA50C03  | 0   |
| 91 | GATA51B02M_13    | GATA51B02  | 1   |
| 92 | GATA52A04M_02_Q  | GATA52A04  | 1   |
| 93 | GATA5B02M_04     | GATA5B02   | 1   |
| 94 | GATA62F03M_09    | GATA62F03  | 1   |
| 95 | GATA63A03N_15    | GATA63A03  | 0   |
| 96 | GATA63D12P_12    | GATA63D12  | 7   |
| 97 | GATA65C03M_02_Q  | GATA65C03  | 1   |
| 98 | GATA69E12M_02_P  | GATA69E12  | 1   |
| 99 | GATA6B02P_08     | GATA6B02   | 7   |

|     |                 |           |     |
|-----|-----------------|-----------|-----|
| 100 | GATA6B09P_11    | GATA6B09  | 7   |
| 101 | GATA72G09N_04   | GATA72G09 | 0   |
| 102 | GATA72G11N_02_P | GATA72G11 | 0   |
| 103 | GATA73D10L_07_P | GATA73D10 | -4  |
| 104 | GATA73F01M_15   | GATA73F01 | 1   |
| 105 | GATA73H09N_12   | GATA73H09 | 0   |
| 106 | GATA74E02Z_14   | GATA74E02 | 0   |
| 107 | GATA7C06M_05_P  | GATA7C06  | 1   |
| 108 | GATA7D01ZP_04   | GATA7D01  | -37 |
| 109 | GATA81C04M_09   | GATA81C04 | 1   |
| 110 | GATA81D12M_16   | GATA81D12 | 1   |
| 111 | GATA85A04M_12   | GATA85A04 | 1   |
| 112 | GATA86E02P_02_P | GATA86E02 | 7   |
| 113 | GATA87E02N_09   | GATA87E02 | 0   |
| 114 | GATA88H02N_15   | GATA88H02 | 0   |
| 115 | GATA89G08Z_05_Q | GATA89G08 | -31 |
| 116 | GATA8B05M_03_P  | GATA8B05  | 1   |
| 117 | GATA8G10M_08    | GATA8G10  | 1   |
| 118 | GATA90D07N_11   | GATA90D07 | 0   |
| 119 | GATA91H06M_12   | GATA91H06 | 1   |
| 120 | GGAA10C09P_14   | GGAA10C09 | 7   |
| 121 | GGAA10F06M_22   | GGAA10F06 | 1   |
| 122 | GGAA17G05P_11   | GGAA17G05 | 7   |
| 123 | GGAA20C10M_08   | GGAA20C10 | 1   |
| 124 | GGAA20G10M_02_P | GGAA20G10 | 1   |
| 125 | GGAA21G11L_14   | GGAA21G11 | 2   |
| 126 | GGAA22G10N_01_Q | GGAA22G10 | 0   |
| 127 | GGAA23C05N_10   | GGAA23C05 | 0   |
| 128 | GGAA29H03N_13   | GGAA29H03 | 0   |
| 129 | GGAA2F11N_10    | GGAA2F11  | 0   |
| 130 | GGAA3A07M_01_P  | GGAA3A07  | 1   |
| 131 | GGAA4B09N_03_P  | GGAA4B09  | ?   |
| 132 | GGAA6D03N_07_Q  | GGAA6D03  | 0   |
| 133 | GGAT3H10M_06_P  | GGT3H10   | 1   |
| 134 | SRAP_02_P       | SRA       | 7   |
| 135 | UT1355Z_21      | UT1355    | 3   |
| 136 | UT2095M_11      | UT2095    | 1   |
| 137 | UT7129L_08      | UT7129    | -1  |
| 138 | UT721M_08       | UT721     | 1   |

Only those markers for which there was a change in primers are shown; this includes cases in which the primers changed, but the change did not affect the allele sizes. Markers highlighted in yellow were excluded from combined analysis of the HGDP-CEPH and India data, either because the appropriate allele size shift could not be determined, or because a systematic change in allele calling occurred.
