# Supplementary material
Source: PubMed Central journal article supplement (PMC1756908)
Supplement: pgen.0020215.st002.pdf [file pgen.0020215.st002.pdf]

**Table S2.** Latitudes and longitudes used for the samples from India.

| <b>Language group</b> | <b>Sample size</b> | <b>Latitude (degrees north)</b> | <b>Longitude (degrees east)</b> |
|-----------------------|--------------------|---------------------------------|---------------------------------|
| Assamese              | 25                 | 26                              | 93                              |
| Bengali               | 27                 | 23.25766454                     | 87.66666667                     |
| Gujarati              | 50                 | 23                              | 72                              |
| Hindi                 | 28                 | 26.98091726                     | 78.39357143                     |
| Kannada               | 24                 | 15                              | 75                              |
| Kashmiri              | 25                 | 32.44                           | 74.54                           |
| Konkani               | 42                 | 14.57081522                     | 75.13095238                     |
| Malayalam             | 25                 | 10                              | 76.25                           |
| Marathi               | 26                 | 19.81684261                     | 75.94230769                     |
| Marwari               | 25                 | 26.67171131                     | 74.264                          |
| Oriya                 | 26                 | 20                              | 85                              |
| Parsi                 | 25                 | 19                              | 72.8                            |
| Punjabi               | 28                 | 30.47159766                     | 75.29071429                     |
| Tamil                 | 29                 | 11.10167224                     | 77.94827586                     |
| Telugu                | 27                 | 15.92575810                     | 79.62962963                     |
