# Supplementary material
Source: PubMed Central journal article supplement (PMC1756908)
Supplement: pgen.0020215.st003.pdf [file pgen.0020215.st003.pdf]

**Table S3.** Pairwise values of  $F_{st}$  for Indian populations.

|           | Assam.      | Beng.       | Gujar.      | Hindi       | Kann.       | Kashm.      | Konk.       | Malaya.     | Mara.       | Marw.       | Oriya       | Parsi       | Punj.       | Tamil       | Telu.       |
|-----------|-------------|-------------|-------------|-------------|-------------|-------------|-------------|-------------|-------------|-------------|-------------|-------------|-------------|-------------|-------------|
| Assamese  |             | 0.30        | <b>0.97</b> | <b>0.58</b> | <b>0.57</b> | <b>0.79</b> | <b>0.53</b> | <b>0.89</b> | 0.43        | <b>1.01</b> | <b>0.46</b> | <b>2.95</b> | <b>0.57</b> | <b>0.54</b> | 0.11        |
| Bengali   | <b>0.16</b> |             | <b>0.69</b> | <b>0.51</b> | <b>0.64</b> | <b>0.81</b> | <b>0.99</b> | <b>0.97</b> | <b>0.66</b> | <b>0.86</b> | 0.25        | <b>2.53</b> | <b>0.70</b> | 0.44        | <b>0.44</b> |
| Gujarati  | <b>0.55</b> | <b>0.53</b> |             | <b>0.76</b> | <b>0.62</b> | <b>0.99</b> | <b>1.01</b> | <b>0.76</b> | 0.38        | <b>0.70</b> | <b>0.82</b> | <b>2.99</b> | <b>0.75</b> | <b>0.70</b> | <b>0.45</b> |
| Hindi     | <b>0.27</b> | <b>0.12</b> | <b>0.59</b> |             | 0.37        | <b>0.64</b> | <b>0.92</b> | <b>0.51</b> | <b>0.54</b> | <b>0.63</b> | <b>0.65</b> | <b>2.28</b> | 0.32        | 0.26        | 0.35        |
| Kannada   | <b>0.21</b> | <b>0.21</b> | <b>0.52</b> | <b>0.24</b> |             | <b>0.56</b> | <b>0.38</b> | 0.02        | 0.11        | <b>1.02</b> | 0.06        | <b>2.51</b> | 0.44        | 0.11        | 0.14        |
| Kashmiri  | <b>0.44</b> | <b>0.24</b> | <b>0.66</b> | <b>0.22</b> | <b>0.40</b> |             | <b>0.78</b> | 0.35        | <b>0.56</b> | <b>1.54</b> | <b>0.85</b> | <b>2.06</b> | 0.04        | 0.44        | <b>0.56</b> |
| Konkani   | <b>0.58</b> | <b>0.43</b> | <b>0.93</b> | <b>0.57</b> | <b>0.41</b> | <b>0.61</b> |             | <b>0.46</b> | 0.17        | <b>1.16</b> | <b>0.53</b> | <b>2.15</b> | <b>0.51</b> | <b>0.50</b> | 0.29        |
| Malayalam | <b>0.25</b> | <b>0.18</b> | <b>0.59</b> | <b>0.28</b> | <b>0.23</b> | <b>0.37</b> | <b>0.56</b> |             | 0.07        | <b>0.67</b> | 0.38        | <b>2.85</b> | 0.37        | 0.31        | -0.12       |
| Marathi   | <b>0.37</b> | <b>0.16</b> | <b>0.58</b> | <b>0.12</b> | <b>0.24</b> | <b>0.32</b> | <b>0.42</b> | <b>0.20</b> |             | 0.45        | 0.26        | <b>2.46</b> | 0.40        | 0.09        | -0.22       |
| Marwari   | <b>0.44</b> | <b>0.24</b> | <b>0.66</b> | <b>0.26</b> | <b>0.29</b> | <b>0.49</b> | <b>0.74</b> | <b>0.40</b> | <b>0.33</b> |             | <b>0.61</b> | <b>2.86</b> | <b>1.02</b> | <b>0.86</b> | <b>0.60</b> |
| Oriya     | <b>0.18</b> | 0.07        | <b>0.46</b> | <b>0.17</b> | 0.06        | <b>0.29</b> | <b>0.51</b> | <b>0.19</b> | <b>0.27</b> | <b>0.35</b> |             | <b>2.88</b> | <b>0.57</b> | 0.37        | 0.12        |
| Parsi     | <b>1.39</b> | <b>1.36</b> | <b>1.64</b> | <b>1.18</b> | <b>1.37</b> | <b>1.05</b> | <b>1.49</b> | <b>1.35</b> | <b>1.23</b> | <b>1.51</b> | <b>1.34</b> |             | <b>1.33</b> | <b>2.24</b> | <b>2.99</b> |
| Punjabi   | <b>0.29</b> | <b>0.24</b> | <b>0.57</b> | 0.05        | <b>0.25</b> | <b>0.14</b> | <b>0.56</b> | <b>0.31</b> | <b>0.26</b> | <b>0.40</b> | <b>0.20</b> | <b>0.91</b> |             | 0.01        | <b>0.53</b> |
| Tamil     | <b>0.32</b> | <b>0.15</b> | <b>0.55</b> | <b>0.25</b> | <b>0.13</b> | <b>0.25</b> | <b>0.58</b> | <b>0.20</b> | <b>0.16</b> | <b>0.39</b> | <b>0.14</b> | <b>1.19</b> | <b>0.24</b> |             | 0.27        |
| Telugu    | <b>0.34</b> | <b>0.12</b> | <b>0.58</b> | <b>0.18</b> | <b>0.13</b> | <b>0.42</b> | <b>0.52</b> | <b>0.21</b> | <b>0.24</b> | <b>0.43</b> | 0.09        | <b>1.43</b> | <b>0.35</b> | <b>0.20</b> |             |

The  $F_{st}$  estimates equal the values shown divided by a factor of 100. Values for microsatellites and indels are shown below and above the diagonal, respectively. Estimates for which the bootstrap 95% confidence interval did not overlap zero are shown in bold.
